# Supplementary material
Source: PubMed Central journal article supplement (PMC6348881)

Supplementary Table 1. Detail KEGG human pathway result

| Pathway name                                          | Total metabolites | Expected | Hits | Raw p   | -LOG(p) | Holm adjust | FDR     | Impact  |
|-------------------------------------------------------|-------------------|----------|------|---------|---------|-------------|---------|---------|
| <b>1-hour only data</b>                               |                   |          |      |         |         |             |         |         |
| Glycerophospholipid metabolism                        | 39                | 0.23     | 4    | 5.2E-05 | 9.83    | 4.2E-03     | 4.2E-03 | 1.4E-01 |
| Ascorbate and aldarate metabolism                     | 45                | 0.26     | 3    | 1.9E-03 | 6.23    | 1.5E-01     | 7.7E-02 | 8.0E-03 |
| Ether lipid metabolism                                | 23                | 0.13     | 2    | 7.4E-03 | 4.90    | 5.8E-01     | 2.0E-01 | 0.0E+00 |
| D-Glutamine and D-glutamate metabolism                | 11                | 0.06     | 1    | 6.2E-02 | 2.78    | 1.0E+00     | 1.0E+00 | 0.0E+00 |
| Citrate cycle (TCA cycle)                             | 20                | 0.12     | 1    | 1.1E-01 | 2.20    | 1.0E+00     | 1.0E+00 | 8.6E-02 |
| Taurine and hypotaurine metabolism                    | 20                | 0.12     | 1    | 1.1E-01 | 2.20    | 1.0E+00     | 1.0E+00 | 3.3E-01 |
| Alanine, aspartate and glutamate metabolism           | 24                | 0.14     | 1    | 1.3E-01 | 2.03    | 1.0E+00     | 1.0E+00 | 0.0E+00 |
| Sphingolipid metabolism                               | 25                | 0.15     | 1    | 1.4E-01 | 1.99    | 1.0E+00     | 1.0E+00 | 1.3E-02 |
| Lysine biosynthesis                                   | 32                | 0.19     | 1    | 1.7E-01 | 1.76    | 1.0E+00     | 1.0E+00 | 0.0E+00 |
| Vitamin B6 metabolism                                 | 32                | 0.19     | 1    | 1.7E-01 | 1.76    | 1.0E+00     | 1.0E+00 | 1.9E-02 |
| Nitrogen metabolism                                   | 39                | 0.23     | 1    | 2.0E-01 | 1.59    | 1.0E+00     | 1.0E+00 | 0.0E+00 |
| Inositol phosphate metabolism                         | 39                | 0.23     | 1    | 2.0E-01 | 1.59    | 1.0E+00     | 1.0E+00 | 1.4E-01 |
| Butanoate metabolism                                  | 40                | 0.23     | 1    | 2.1E-01 | 1.56    | 1.0E+00     | 1.0E+00 | 0.0E+00 |
| Galactose metabolism                                  | 41                | 0.24     | 1    | 2.1E-01 | 1.54    | 1.0E+00     | 1.0E+00 | 0.0E+00 |
| Histidine metabolism                                  | 44                | 0.26     | 1    | 2.3E-01 | 1.48    | 1.0E+00     | 1.0E+00 | 0.0E+00 |
| Phenylalanine metabolism                              | 45                | 0.26     | 1    | 2.3E-01 | 1.46    | 1.0E+00     | 1.0E+00 | 0.0E+00 |
| Primary bile acid biosynthesis                        | 47                | 0.27     | 1    | 2.4E-01 | 1.42    | 1.0E+00     | 1.0E+00 | 8.2E-03 |
| Glycine, serine and threonine metabolism              | 48                | 0.28     | 1    | 2.5E-01 | 1.40    | 1.0E+00     | 1.0E+00 | 7.1E-04 |
| Glyoxylate and dicarboxylate metabolism               | 50                | 0.29     | 1    | 2.6E-01 | 1.37    | 1.0E+00     | 1.0E+00 | 0.0E+00 |
| Arginine and proline metabolism                       | 77                | 0.45     | 1    | 3.7E-01 | 1.00    | 1.0E+00     | 1.0E+00 | 3.2E-02 |
| Drug metabolism - cytochrome P450                     | 86                | 0.50     | 1    | 4.0E-01 | 0.92    | 1.0E+00     | 1.0E+00 | 2.1E-02 |
| Purine metabolism                                     | 92                | 0.54     | 1    | 4.2E-01 | 0.86    | 1.0E+00     | 1.0E+00 | 9.7E-03 |
| <b>1- and 24-hour data</b>                            |                   |          |      |         |         |             |         |         |
| Aminocyl-tRNA biosynthesis                            | 75                | 0.41     | 8    | 6.9E-10 | 21.09   | 5.5E-08     | 5.5E-08 | 1.1E-01 |
| Arginine and proline metabolism                       | 77                | 0.42     | 6    | 1.3E-06 | 13.38   | 1.0E-04     | 5.1E-03 | 2.7E-01 |
| Alanine, aspartate and glutamate metabolism           | 24                | 0.13     | 4    | 5.1E-06 | 12.18   | 4.0E-04     | 1.4E-04 | 7.1E-01 |
| Nitrogen metabolism                                   | 39                | 0.21     | 4    | 3.8E-05 | 10.18   | 2.9E-03     | 7.6E-04 | 6.7E-04 |
| D-Arginine and D-orithine metabolism                  | 8                 | 0.04     | 2    | 7.4E-04 | 7.21    | 5.6E-02     | 1.2E-02 | 5.0E-01 |
| D-Glutamine and D-glutamate metabolism                | 11                | 0.06     | 2    | 1.4E-03 | 6.54    | 1.1E-01     | 1.9E-02 | 1.4E-01 |
| Histidine metabolism                                  | 44                | 0.24     | 2    | 2.2E-02 | 3.80    | 1.0E+00     | 2.6E-01 | 5.1E-04 |
| Glycine, serine and threonine metabolism              | 48                | 0.26     | 2    | 2.6E-02 | 3.63    | 1.0E+00     | 2.6E-01 | 9.7E-02 |
| Cysteine and methionine metabolism                    | 56                | 0.30     | 2    | 3.5E-02 | 3.33    | 1.0E+00     | 3.1E-01 | 0.0E+00 |
| Cyanoamino acid metabolism                            | 16                | 0.09     | 1    | 8.3E-02 | 2.49    | 1.0E+00     | 6.4E-01 | 0.0E+00 |
| Taurine and hypotaurine metabolism                    | 20                | 0.11     | 1    | 1.0E-01 | 2.27    | 1.0E+00     | 6.4E-01 | 3.2E-02 |
| Porphyrin and chlorophyll metabolism                  | 104               | 0.56     | 2    | 1.1E-01 | 2.23    | 1.0E+00     | 6.4E-01 | 0.0E+00 |
| Selenoamino acid metabolism                           | 22                | 0.12     | 1    | 1.1E-01 | 2.18    | 1.0E+00     | 6.4E-01 | 0.0E+00 |
| Valine, leucine and isoleucine biosynthesis           | 27                | 0.13     | 1    | 1.4E-01 | 1.99    | 1.0E+00     | 6.4E-01 | 0.0E+00 |
| Pantothenate and CoA biosynthesis                     | 27                | 0.13     | 1    | 1.4E-01 | 1.99    | 1.0E+00     | 6.4E-01 | 0.0E+00 |
| Phenylalanine, tyrosine and tryptophan biosynthesis   | 27                | 0.13     | 1    | 1.4E-01 | 1.99    | 1.0E+00     | 6.4E-01 | 6.2E-04 |
| beta-Alanine metabolism                               | 28                | 0.13     | 1    | 1.4E-01 | 1.96    | 1.0E+00     | 6.4E-01 | 0.0E+00 |
| Glycolysis or Gluconeogenesis                         | 31                | 0.17     | 1    | 1.6E-01 | 1.86    | 1.0E+00     | 6.4E-01 | 0.0E+00 |
| Pentose phosphate pathway                             | 32                | 0.17     | 1    | 1.6E-01 | 1.83    | 1.0E+00     | 6.4E-01 | 0.0E+00 |
| Lysine biosynthesis                                   | 32                | 0.17     | 1    | 1.6E-01 | 1.83    | 1.0E+00     | 6.4E-01 | 0.0E+00 |
| Glutathione metabolism                                | 38                | 0.21     | 1    | 1.9E-01 | 1.68    | 1.0E+00     | 6.7E-01 | 1.1E-02 |
| Glycerophospholipid metabolism                        | 39                | 0.21     | 1    | 1.9E-01 | 1.63    | 1.0E+00     | 6.7E-01 | 3.2E-03 |
| Butanoate metabolism                                  | 40                | 0.22     | 1    | 2.0E-01 | 1.63    | 1.0E+00     | 6.7E-01 | 0.0E+00 |
| Galactose metabolism                                  | 41                | 0.22     | 1    | 2.0E-01 | 1.61    | 1.0E+00     | 6.7E-01 | 2.8E-03 |
| Nicotinate and nicotinamide metabolism                | 44                | 0.24     | 1    | 2.1E-01 | 1.54    | 1.0E+00     | 6.7E-01 | 0.0E+00 |
| Phenylalanine metabolism                              | 45                | 0.24     | 1    | 2.2E-01 | 1.52    | 1.0E+00     | 6.7E-01 | 1.2E-01 |
| Starch and sucrose metabolism                         | 50                | 0.27     | 1    | 2.4E-01 | 1.43    | 1.0E+00     | 7.1E-01 | 1.7E-02 |
| Pyrimidine metabolism                                 | 60                | 0.32     | 1    | 2.8E-01 | 1.27    | 1.0E+00     | 8.0E-01 | 0.0E+00 |
| Amino sugar and nucleotide sugar metabolism           | 88                | 0.48     | 1    | 3.8E-01 | 0.96    | 1.0E+00     | 1.0E+00 | 0.0E+00 |
| Purine metabolism                                     | 92                | 0.50     | 1    | 4.0E-01 | 0.92    | 1.0E+00     | 1.0E+00 | 0.0E+00 |
| <b>24-hour only data</b>                              |                   |          |      |         |         |             |         |         |
| Aminocyl-tRNA biosynthesis                            | 75                | 0.47     | 8    | 7.3E-11 | 23.33   | 5.9E-09     | 5.9E-09 | 1.1E-01 |
| Nitrogen metabolism                                   | 39                | 0.24     | 5    | 2.3E-06 | 12.99   | 1.8E-04     | 9.2E-03 | 7.6E-03 |
| Cyanoamino acid metabolism                            | 16                | 0.10     | 3    | 1.0E-04 | 9.17    | 8.2E-03     | 2.8E-03 | 0.0E+00 |
| Glycine, serine and threonine metabolism              | 48                | 0.30     | 4    | 1.6E-04 | 8.73    | 1.2E-02     | 3.2E-03 | 3.2E-01 |
| Glycerophospholipid metabolism                        | 39                | 0.24     | 3    | 1.6E-03 | 6.46    | 1.2E-01     | 2.5E-02 | 2.3E-01 |
| Thiamine metabolism                                   | 24                | 0.15     | 2    | 9.2E-03 | 4.68    | 6.9E-01     | 1.0E-01 | 0.0E+00 |
| Sphingolipid metabolism                               | 25                | 0.16     | 2    | 1.0E-02 | 4.60    | 7.4E-01     | 1.0E-01 | 9.5E-03 |
| Phenylalanine, tyrosine and tryptophan biosynthesis   | 27                | 0.17     | 2    | 1.2E-02 | 4.45    | 8.5E-01     | 1.0E-01 | 7.4E-03 |
| Valine, leucine and isoleucine biosynthesis           | 27                | 0.17     | 2    | 1.2E-02 | 4.45    | 8.5E-01     | 1.0E-01 | 2.7E-02 |
| Methane metabolism                                    | 34                | 0.21     | 2    | 1.8E-02 | 4.01    | 1.0E+00     | 1.5E-01 | 1.8E-02 |
| Valine, leucine and isoleucine degradation            | 40                | 0.25     | 2    | 2.5E-02 | 3.70    | 1.0E+00     | 1.8E-01 | 2.2E-02 |
| Lysine degradation                                    | 47                | 0.29     | 2    | 3.3E-02 | 3.40    | 1.0E+00     | 2.2E-01 | 1.5E-01 |
| Biotin metabolism                                     | 11                | 0.07     | 1    | 6.7E-02 | 2.71    | 1.0E+00     | 4.1E-01 | 0.0E+00 |
| Glycosylphosphatidylinositol(GPI) anchor biosynthesis | 14                | 0.09     | 1    | 8.4E-02 | 2.48    | 1.0E+00     | 4.8E-01 | 4.4E-02 |
| Linoleic acid metabolism                              | 15                | 0.09     | 1    | 9.0E-02 | 2.41    | 1.0E+00     | 4.8E-01 | 0.0E+00 |
| Sulfur metabolism                                     | 18                | 0.11     | 1    | 1.1E-01 | 2.24    | 1.0E+00     | 5.3E-01 | 0.0E+00 |
| Alanine, aspartate and glutamate metabolism           | 24                | 0.15     | 1    | 1.4E-01 | 1.97    | 1.0E+00     | 6.1E-01 | 4.6E-02 |
| beta-Alanine metabolism                               | 28                | 0.17     | 1    | 1.6E-01 | 1.82    | 1.0E+00     | 6.1E-01 | 0.0E+00 |
| alpha-Linolenic acid metabolism                       | 29                | 0.18     | 1    | 1.7E-01 | 1.79    | 1.0E+00     | 6.1E-01 | 0.0E+00 |
| Glycolysis or Gluconeogenesis                         | 31                | 0.19     | 1    | 1.8E-01 | 1.73    | 1.0E+00     | 6.1E-01 | 0.0E+00 |
| Glycerolipid metabolism                               | 32                | 0.20     | 1    | 1.8E-01 | 1.70    | 1.0E+00     | 6.1E-01 | 2.1E-02 |
| Pentose phosphate pathway                             | 32                | 0.20     | 1    | 1.8E-01 | 1.70    | 1.0E+00     | 6.1E-01 | 2.2E-02 |
| Lysine biosynthesis                                   | 32                | 0.20     | 1    | 1.8E-01 | 1.70    | 1.0E+00     | 6.1E-01 | 1.0E-01 |
| Pyruvate metabolism                                   | 32                | 0.20     | 1    | 1.8E-01 | 1.70    | 1.0E+00     | 6.1E-01 | 1.4E-01 |
| Propanoate metabolism                                 | 35                | 0.22     | 1    | 2.0E-01 | 1.62    | 1.0E+00     | 6.2E-01 | 0.0E+00 |
| Ubiquinone and other terpenoid-quinone biosynthesis   | 36                | 0.22     | 1    | 2.0E-01 | 1.60    | 1.0E+00     | 6.2E-01 | 0.0E+00 |
| Glutathione metabolism                                | 38                | 0.24     | 1    | 2.1E-01 | 1.55    | 1.0E+00     | 6.3E-01 | 0.0E+00 |
| Histidine metabolism                                  | 44                | 0.27     | 1    | 2.4E-01 | 1.42    | 1.0E+00     | 6.8E-01 | 1.4E-01 |
| Phenylalanine metabolism                              | 45                | 0.28     | 1    | 2.5E-01 | 1.40    | 1.0E+00     | 6.8E-01 | 0.0E+00 |
| Primary bile acid biosynthesis                        | 47                | 0.29     | 1    | 2.6E-01 | 1.36    | 1.0E+00     | 6.8E-01 | 8.2E-03 |
| Glyoxylate and dicarboxylate metabolism               | 50                | 0.31     | 1    | 2.7E-01 | 1.31    | 1.0E+00     | 7.0E-01 | 3.3E-02 |
| Cysteine and methionine metabolism                    | 56                | 0.35     | 1    | 3.0E-01 | 1.21    | 1.0E+00     | 7.5E-01 | 1.2E-02 |
| Arachidonic acid metabolism                           | 62                | 0.39     | 1    | 3.2E-01 | 1.12    | 1.0E+00     | 7.9E-01 | 0.0E+00 |
| Tyrosine metabolism                                   | 76                | 0.47     | 1    | 3.8E-01 | 0.96    | 1.0E+00     | 9.0E-01 | 4.7E-02 |
| Tryptophan metabolism                                 | 79                | 0.49     | 1    | 3.9E-01 | 0.93    | 1.0E+00     | 9.0E-01 | 1.1E-01 |
| Purine metabolism                                     | 92                | 0.57     | 1    | 4.4E-01 | 0.81    | 1.0E+00     | 9.9E-01 | 0.0E+00 |
| Porphyrin and chlorophyll metabolism                  | 104               | 0.65     | 1    | 4.9E-01 | 0.72    | 1.0E+00     | 1.0E+00 | 0.0E+00 |

Supplementary Table 2. Significantly altered metabolites in BALF samples. Metabolites that are significantly altered between ozone and air ( $p < 0.05$ ) are shown with fold change and highlighted in color (yellow for up-regulation and blue for down-regulation) for the 1 hour and 24 hour data. Three subgroups are presented for each time point: all subjects, GSTM1 + and GSTM1 – subjects. The metabolites are categorized into super- and sub-pathways based on Metabolon’s classification.

|                                          |                                                          |                                                       | 1 hr All               | 1 hr G+ | 1 hr G- | 24 hr All | 24 hr G+ | 24 hr G- |      |
|------------------------------------------|----------------------------------------------------------|-------------------------------------------------------|------------------------|---------|---------|-----------|----------|----------|------|
| Amino Acid                               | Glycine, Serine and Threonine Metabolism                 | glycine                                               | 1.37                   | 0.86    | 2.47    | 1.39      | 1.64     | 1.19     |      |
|                                          |                                                          | serine                                                | 1.39                   | 1.29    | 1.53    | 1.69      | 1.63     | 1.74     |      |
|                                          |                                                          | N-acetylserine                                        | 0.98                   | 0.86    | 1.14    | 1.20      | 1.11     | 1.29     |      |
|                                          |                                                          |                                                       | threonine              | 1.73    | 1.40    | 2.26      | 1.35     | 1.21     | 1.50 |
|                                          | Alanine and Aspartate Metabolism                         | alanine                                               | 1.92                   | 1.40    | 2.83    | 1.64      | 1.38     | 1.92     |      |
|                                          |                                                          | aspartate                                             | 2.32                   | 2.31    | 2.34    | 1.50      | 1.49     | 1.50     |      |
|                                          |                                                          | asparagine                                            | 2.17                   | 1.95    | 2.48    | 1.84      | 1.94     | 1.75     |      |
|                                          |                                                          | glutamate                                             | 1.75                   | 1.68    | 1.83    | 1.40      | 1.46     | 1.34     |      |
|                                          | Glutamate Metabolism                                     | glutamine                                             | 1.92                   | 1.44    | 2.74    | 1.37      | 1.22     | 1.52     |      |
|                                          |                                                          | histidine                                             | 1.67                   | 1.36    | 2.14    | 1.78      | 1.90     | 1.68     |      |
|                                          | Histidine Metabolism                                     | lysine                                                | 1.64                   | 1.22    | 2.38    | 1.49      | 1.24     | 1.77     |      |
|                                          |                                                          | Phenylalanine and Tyrosine Metabolism                 | phenylalanine          | 2.05    | 1.49    | 3.03      | 1.68     | 1.47     | 1.91 |
|                                          | tyrosine                                                 |                                                       | 1.68                   | 0.91    | 3.63    | 1.66      | 1.35     | 2.00     |      |
|                                          | phenol sulfate                                           |                                                       | 1.32                   | 1.43    | 1.19    | 1.35      | 1.20     | 1.53     |      |
|                                          | p-cresol sulfate                                         |                                                       | 2.14                   | 2.63    | 1.65    | 1.32      | 1.10     | 1.55     |      |
|                                          | Tryptophan Metabolism                                    | tryptophan                                            | 1.95                   | 1.42    | 2.89    | 1.46      | 1.31     | 1.62     |      |
|                                          |                                                          | Leucine, Isoleucine and Valine Metabolism             | leucine                | 1.51    | 1.28    | 1.86      | 1.51     | 1.49     | 1.53 |
|                                          | isoleucine                                               |                                                       | 1.10                   | 0.84    | 1.53    | 1.40      | 1.32     | 1.47     |      |
|                                          | Methionine, Cysteine, SAM and Taurine Metabolism         | taurine                                               | 1.23                   | 1.12    | 1.38    | 1.16      | 1.12     | 1.19     |      |
|                                          |                                                          | Urea cycle; Arginine and Proline Metabolism           | arginine               | 1.72    | 1.55    | 1.97      | 1.48     | 1.34     | 1.62 |
|                                          | ornithine                                                |                                                       | 1.95                   | 1.98    | 1.92    | 1.45      | 1.19     | 1.74     |      |
|                                          | proline                                                  |                                                       | 2.22                   | 1.62    | 3.28    | 1.48      | 1.10     | 1.95     |      |
|                                          | Creatine Metabolism                                      | creatine                                              | 2.25                   | 1.32    | 4.37    | 1.17      | 0.87     | 1.53     |      |
| creatinine                               |                                                          | 1.57                                                  | 1.43                   | 1.75    | 1.33    | 1.18      | 1.48     |          |      |
| Carbohydrate                             | Glycolysis, Gluconeogenesis, and Pyruvate Metabolism     | glucose                                               | 1.93                   | 1.24    | 3.36    | 1.47      | 1.30     | 1.64     |      |
|                                          |                                                          | lactate                                               | 0.78                   | 0.44    | 1.56    | 1.52      | 1.28     | 1.79     |      |
|                                          |                                                          | glycerate                                             | 1.19                   | 1.05    | 1.37    | 1.54      | 1.71     | 1.39     |      |
|                                          | Aminosugar Metabolism                                    | erythronate*                                          | 1.19                   | 1.01    | 1.46    | 1.09      | 1.09     | 1.09     |      |
| Energy                                   | TCA Cycle                                                | alpha-ketoglutarate                                   | 1.29                   | 1.11    | 1.57    | 1.11      | 0.93     | 1.30     |      |
| Lipid                                    | Carnitine Metabolism                                     | carnitine                                             | 1.86                   | 1.39    | 2.69    | 1.35      | 1.29     | 1.40     |      |
|                                          |                                                          | Inositol Metabolism                                   | myo-inositol           | 1.37    | 1.31    | 1.45      | 1.09     | 1.13     | 1.06 |
|                                          | Phospholipid Metabolism                                  |                                                       | choline phosphate      | 1.57    | 1.72    | 1.39      | 1.09     | 1.25     | 0.96 |
|                                          |                                                          | glycerophosphorylcholine (GPC)                        | 1.67                   | 1.51    | 1.90    | 1.17      | 1.41     | 0.99     |      |
|                                          |                                                          | phosphoethanolamine                                   | 1.38                   | 1.27    | 1.52    | 1.10      | 1.13     | 1.08     |      |
|                                          |                                                          | glycerophosphoethanolamine                            | 2.57                   | 1.87    | 3.83    | 1.07      | 0.92     | 1.23     |      |
|                                          |                                                          | 1-palmitoyl-2-oleoyl-GPC (16:0/18:1)                  | 0.92                   | 0.88    | 0.97    | 1.13      | 1.07     | 1.20     |      |
|                                          |                                                          | 1-stearoyl-2-arachidonoyl-GPC (18:0/20:4)             | 0.96                   | 0.93    | 1.00    | 1.21      | 1.12     | 1.29     |      |
|                                          |                                                          | 1-stearoyl-2-oleoyl-GPC (18:0/18:1)                   | 0.93                   | 0.86    | 1.04    | 1.20      | 1.13     | 1.28     |      |
|                                          |                                                          | 1-stearoyl-2-arachidonoyl-GPI (18:0/20:4)             | 1.36                   | 1.42    | 1.29    | 1.27      | 1.37     | 1.18     |      |
|                                          |                                                          | 1-palmitoyl-2-oleoyl-GPG (16:0/18:1)                  | 0.89                   | 0.84    | 0.97    | 1.05      | 1.02     | 1.08     |      |
|                                          |                                                          | 1,2-dilinoleoyl-GPC (18:2/18:2)                       | 1.01                   | 1.00    | 1.03    | 1.17      | 1.14     | 1.21     |      |
|                                          |                                                          | 1-palmitoyl-2-oleoyl-GPS (16:0/18:1)                  | 0.90                   | 0.81    | 1.01    | 1.17      | 1.07     | 1.26     |      |
|                                          |                                                          | Lysolipid                                             | 1-palmitoyl-GPC (16:0) | 1.23    | 1.16    | 1.33      | 1.23     | 1.14     | 1.32 |
|                                          |                                                          |                                                       | 1-stearoyl-GPC (18:0)  | 1.79    | 1.79    | 1.79      | 1.61     | 1.60     | 1.62 |
|                                          | Plasmalogen                                              | 1-(1-enyl-stearoyl)-2-linoleoyl-GPE (P-18:0/18:2)*    | 0.93                   | 0.83    | 1.07    | 1.26      | 1.17     | 1.34     |      |
|                                          |                                                          | 1-(1-enyl-stearoyl)-2-arachidonoyl-GPE (P-18:0/20:4)* | 1.07                   | 0.94    | 1.25    | 1.14      | 1.17     | 1.12     |      |
|                                          | Sphingolipid Metabolism                                  | palmitoyl dihydrosphingomyelin (d18:0/16:0)*          | 0.90                   | 0.77    | 1.09    | 1.36      | 1.56     | 1.20     |      |
|                                          |                                                          | palmitoyl sphingomyelin (d18:1/16:0)                  | 0.99                   | 0.90    | 1.11    | 1.16      | 1.23     | 1.10     |      |
|                                          |                                                          | stearoyl sphingomyelin (d18:1/18:0)                   | 1.25                   | 1.60    | 0.93    | 1.25      | 1.27     | 1.24     |      |
|                                          |                                                          | tricosanoyl sphingomyelin (d18:1/23:0)*               | 1.43                   | 1.47    | 1.37    | 1.36      | 1.45     | 1.27     |      |
|                                          |                                                          | sphingomyelin (d18:1/20:0, d16:1/22:0)*               | 1.04                   | 1.00    | 1.10    | 1.17      | 1.12     | 1.20     |      |
|                                          |                                                          | sphingomyelin (d18:1/22:1, d18:2/22:0, d16:1/24:1)*   | 1.47                   | 1.64    | 1.27    | 1.39      | 1.82     | 1.09     |      |
| sphingomyelin (d18:2/24:1, d18:1/24:2)*  |                                                          | 1.10                                                  | 1.03                   | 1.18    | 1.19    | 1.21      | 1.17     |          |      |
| Nucleotide                               | Purine Metabolism, (Hypo)Xanthine/inosine containing     | hypoxanthine                                          | 0.93                   | 0.52    | 1.91    | 1.24      | 1.26     | 1.23     |      |
|                                          |                                                          | urate                                                 | 1.40                   | 1.15    | 1.80    | 1.23      | 1.03     | 1.45     |      |
|                                          |                                                          | allantoin                                             | 2.92                   | 2.50    | 3.56    | 1.08      | 1.20     | 0.98     |      |
| Pyrimidine Metabolism, Uracil containing | uridine                                                  | 1.48                                                  | 1.31                   | 1.72    | 1.25    | 0.97      | 1.59     |          |      |
|                                          | Cofactors and Vitamins Ascorbate and Aldarate Metabolism | threonate                                             | 2.08                   | 1.50    | 3.13    | 1.06      | 1.09     | 1.04     |      |
| Xenobiotics                              |                                                          | Xanthine Metabolism                                   | caffeine               | 0.96    | 0.59    | 1.78      | 0.75     | 0.62     | 0.89 |
|                                          | Food Component/Plant                                     |                                                       | stachydrine            | 1.26    | 1.15    | 1.40      | 1.14     | 0.85     | 1.51 |
|                                          | Drug                                                     | N-ethylglycylglycyl diide                             | 0.36                   | 0.52    | 0.23    | 0.70      | 0.71     | 0.70     |      |
|                                          |                                                          | salicylate                                            | 1.15                   | 1.10    | 1.22    | 1.10      | 1.09     | 1.12     |      |
| Chemical                                 | sulfate*                                                 | 1.06                                                  | 0.98                   | 1.16    | 1.04    | 1.08      | 1.01     |          |      |

(A)

Supplementary Figure 1. IPA Network Analysis result. A detailed network analysis result for the 1-hour (A) and 24-hour (B) data are plotted where the measured metabolites are denoted with orange circle.

(A)

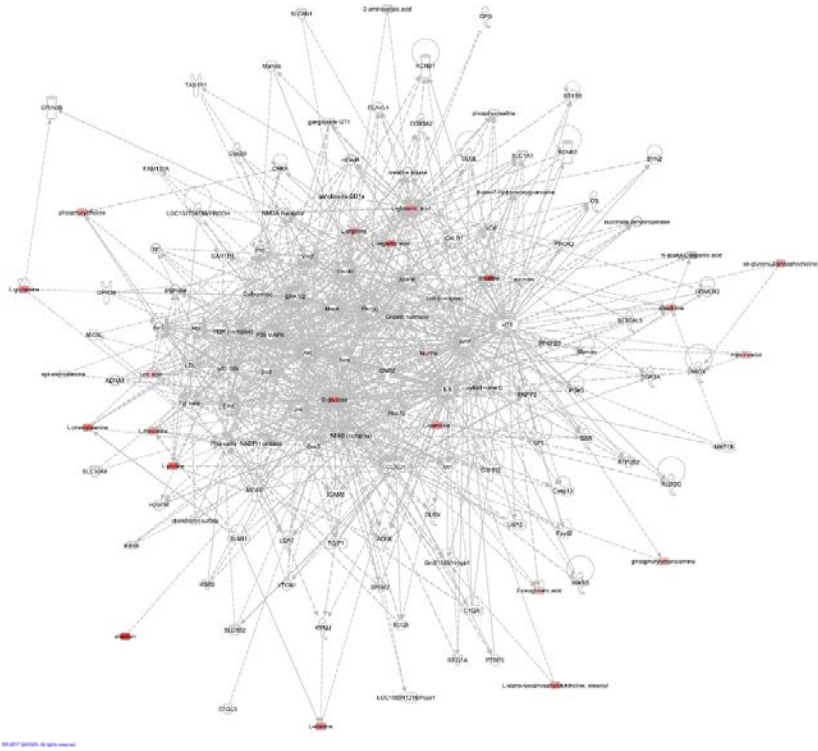

(B)

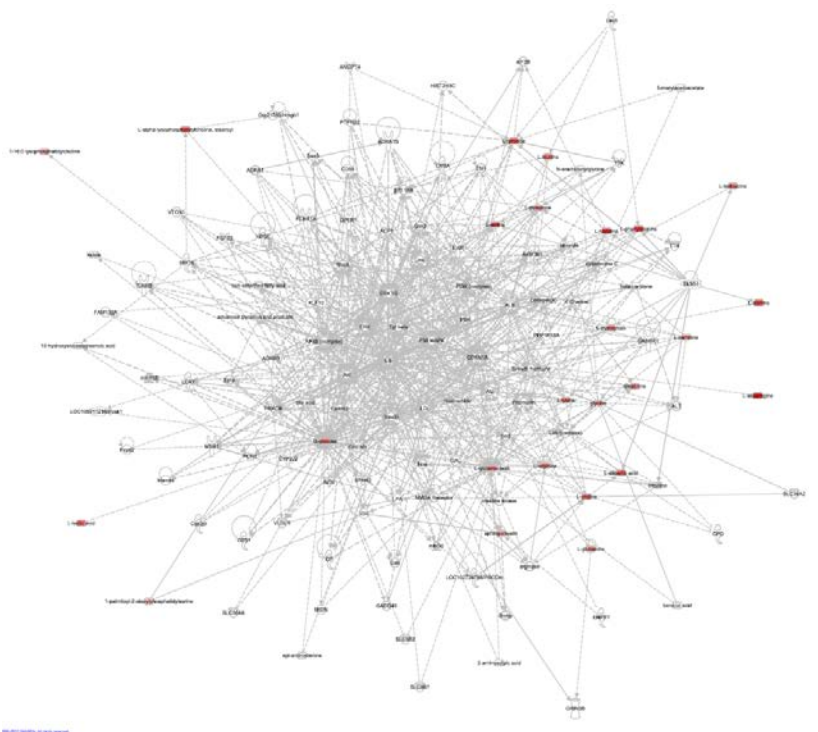

Supplement: NIHMS1511269-supplement-1.pdf [file NIHMS1511269-supplement-1.pdf]
